# Supplementary material for: The effect of umeclidinium added to inhaled corticosteroid/long-acting β2-agonist in patients with symptomatic COPD: a randomised, double-blind, parallel-group study
Source: PubMed Central journal article supplement (PMC4918053; doi:10.1038/npjpcrm.2016.31), 2016-06-23

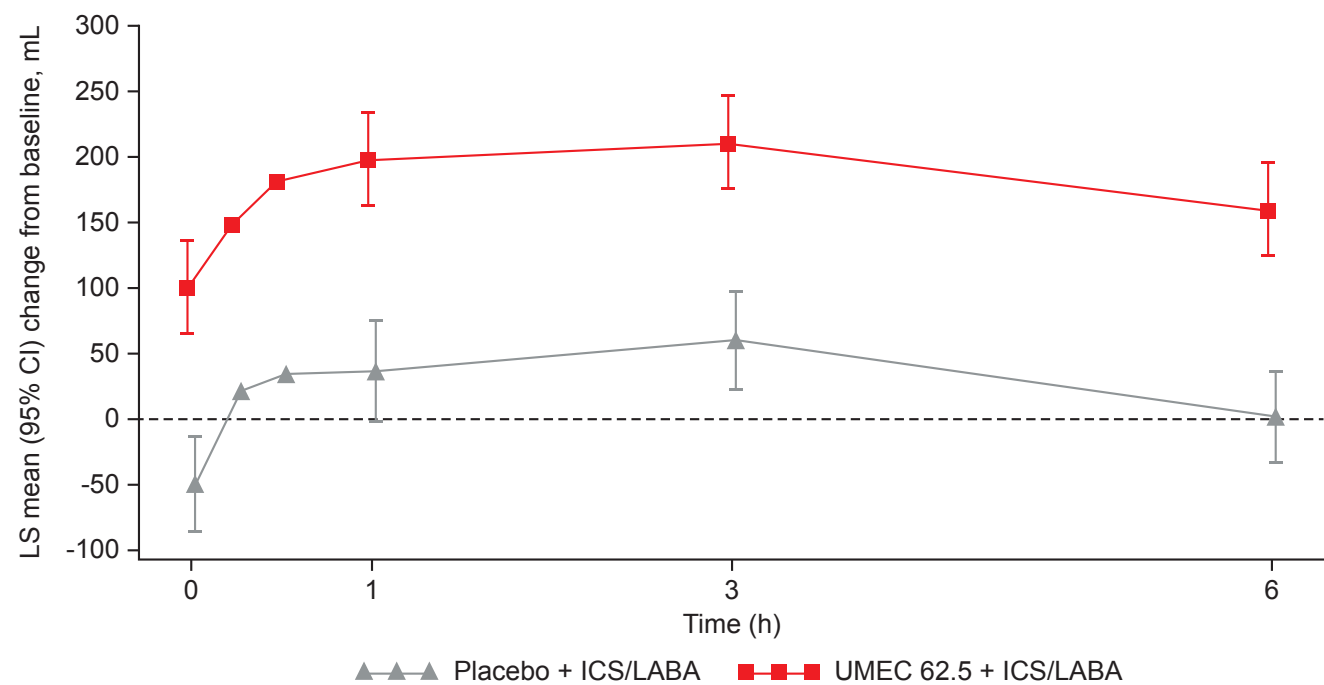

Supplement: npjpcrm201631-s1.pdf [file npjpcrm201631-s1.pdf]
